# Supplementary material for: Charge-reversal-functionalized PLGA nanobubbles as theranostic agents for ultrasonic-imaging-guided combination therapy
Source: Royal Society of Chemistry journal article supplement (doi:10.1039/c8bm00419f), 2018-01-01
Supplement: c8bm00419f1.pdf [file c8bm00419f1.pdf]

## Supporting Information

### **Charge-reversal functionalized PLGA nanobubbles as theranostic agents for ultrasonic imaging-guided combination therapy**

Hong Yang <sup>1,3</sup>, Xue Shen <sup>1</sup>, Jie Yan <sup>1</sup>, Xiaoxue Xie <sup>1</sup>, Zhongyuan Chen<sup>1</sup>, Tingting Li <sup>1</sup>,

Shun Li <sup>1,3</sup>, Xiang Qin <sup>1,3</sup>, Chunhui Wu <sup>1,3</sup>, Yiyao Liu <sup>1,2,3\*</sup>

*<sup>1</sup> Department of Biophysics, School of Life Science and Technology, University of Electronic Science and Technology of China; <sup>2</sup> School of Clinical Medicine/the Affiliated Hospital, Chengdu University of Traditional Chinese Medicine; <sup>3</sup> Center for Information in Biology, University of Electronic Science and Technology of China, Chengdu 610054, Sichuan, P. R. China*

**\* To whom correspondence should be addressed:**

Prof. Yiyao Liu, Ph.D

Department of Biophysics, School of Life Science and Technology, University of Electronic Science and Technology of China, Chengdu 610054, Sichuan, P. R. China.

Tel: +86-28-8320-3353, fax: +86-28-8320-8238, E-mail: [liyiyao@uestc.edu.cn](mailto:liyiyao@uestc.edu.cn) or

[liyiyao@hotmail.com](mailto:liyiyao@hotmail.com)

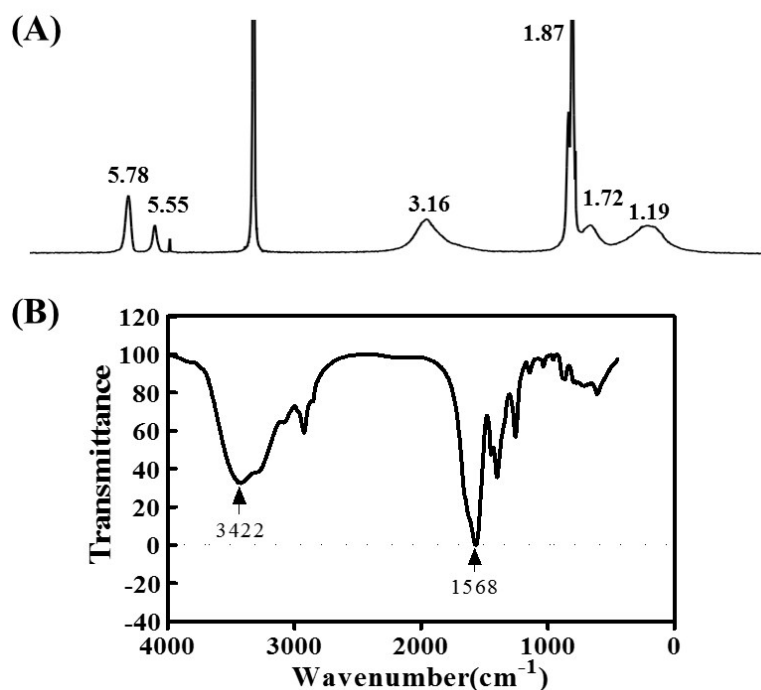

**Figure S1.** Characterization of PAH-Cit. (A) Proton nuclear magnetic resonance (<sup>1</sup>H-NMR) spectrum of PAH-Cit. (B) Fourier transform infrared spectroscopy (FT-IR) spectrum of PAH-Cit.

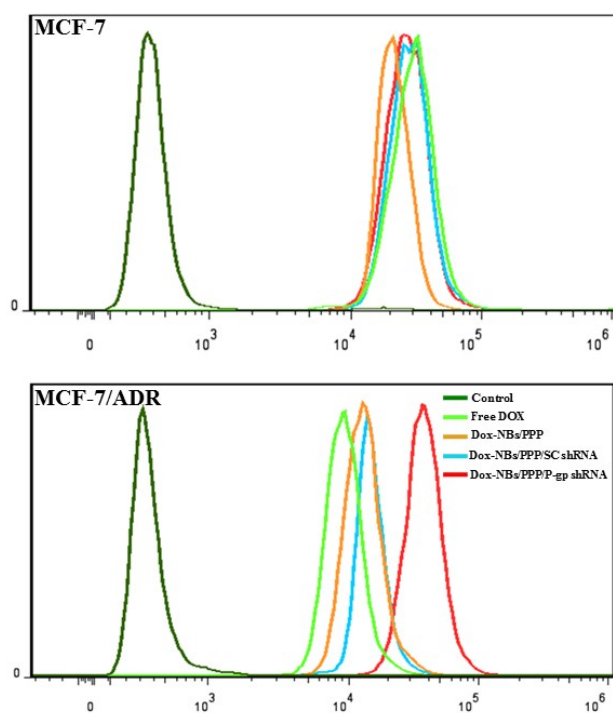

**Figure S2.** Cellular uptake of the Dox in MCF-7 and MCF-7/ADR cells treated with free Dox, Dox-NBs/PPP, Dox-NBs/PPP/SC shRNA and Dox-NBs/PPP/P-gp shRNA for 72 h detected by fluorescence activated cell-sorting (FACS) analysis.

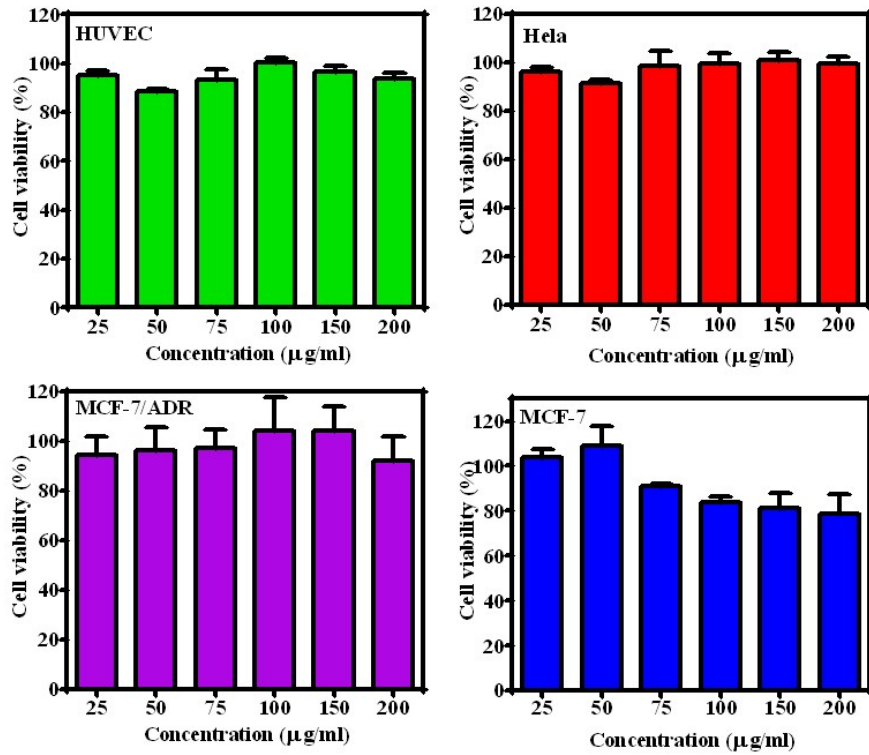

**Figure S3.** *In vitro* cell viability of HUVEC, HeLa, MCF-7 and MCF-7/ADR cells after treatment with NBs/PPP at the concentration of 0-200 µg/mL for 48 h.

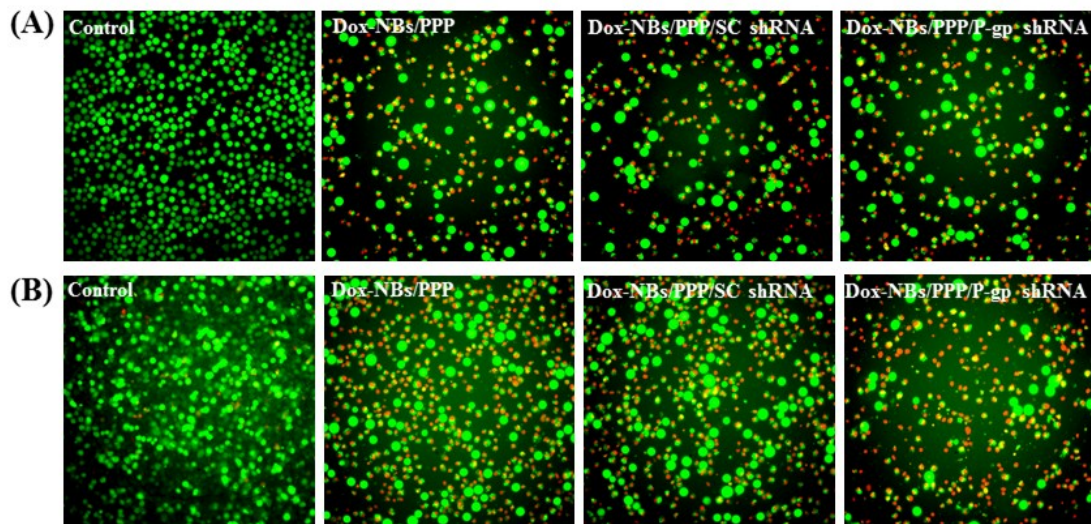

**Figure S4.** Fluorescence microscopy images of MCF-7 cells (A) and MCF-7/ADR cells (B) after various treatments. All the cells were co-stained with Calcein-AM and propidium iodide. Green and red colors represent live and dead cells, respectively.
